# Supplementary material for: Silver(i) pyridylphosphonates – synthesis, structure, stability and light-insensitivity investigation
Source: Royal Society of Chemistry journal article supplement (doi:10.1039/c8ra10136a), 2019-01-01
Supplement: c8ra10136a1.pdf [file c8ra10136a1.pdf]

## Electronic Supplementary material (ESI)

### Silver(I) pyridylphosphonates – synthesis, structure, stability and light-insensitivity investigation

M. Rendošová,<sup>a</sup> R. Gyepes,<sup>b</sup> M. Almáši,<sup>a</sup> I. Bártová<sup>a</sup> and Z. Vargová<sup>\*a</sup>

*<sup>a</sup>Department of Inorganic Chemistry, Faculty of Science, P. J. Šafárik University, Moyzesova 11, 041 54 Košice, Slovak Republic. E-mail: [zuzana.vargova@upjs.sk](mailto:zuzana.vargova@upjs.sk)*

*<sup>b</sup>Department of Inorganic Chemistry, Faculty of Science, Charles University, Hlavova 2030, 128 00 Praha, Czech Republic*

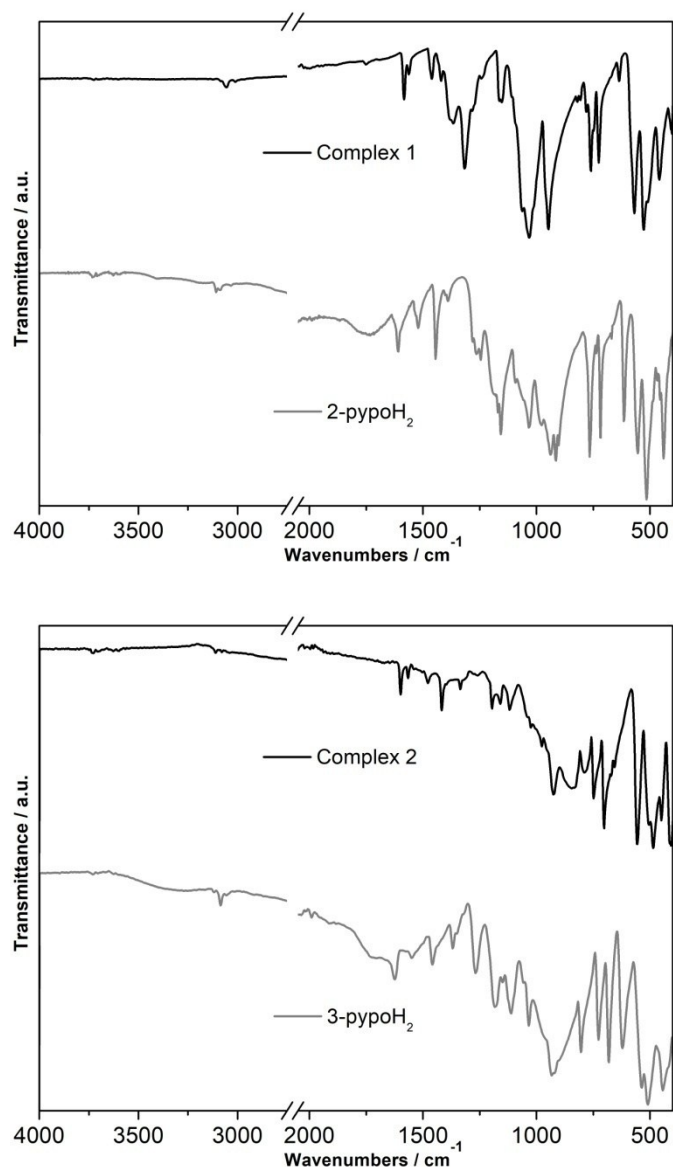

**Fig. S1** IR spectra of ligands 2-pypoH<sub>2</sub> and 3-pypoH<sub>2</sub> and their complexes **1** and **2**.

**Table S1** Selected bond lengths [Å] and angles [°] for complex **1**.

|              |          |
|--------------|----------|
| Ag(1)-O(5)#1 | 2.272(2) |
| Ag(1)-O(4)#2 | 2.317(2) |
| Ag(1)-O(1)   | 2.337(3) |
| Ag(1)-O(4)   | 2.421(2) |
| Ag(2)-O(5)#2 | 2.334(2) |

|               |           |
|---------------|-----------|
| Ag(2)-O(3)    | 2.382(2)  |
| Ag(2)-O(1)    | 2.393(2)  |
| Ag(2)-O(8)#4  | 2.421(2)  |
| Ag(3)-O(2)    | 2.327(2)  |
| Ag(3)-O(3)#5  | 2.328(2)  |
| Ag(3)-O(6)    | 2.436(2)  |
| Ag(4)-N(1)    | 2.212(3)  |
| Ag(4)-O(6)    | 2.234(2)  |
| Ag(4)-O(3)    | 2.445(2)  |
| Ag(4)-O(4)    | 2.532(2)  |
| Ag(5)-O(7)    | 2.294(2)  |
| Ag(5)-O(9)    | 2.336(2)  |
| Ag(5)-O(8)    | 2.430(2)  |
| Ag(5)-O(2)#4  | 2.491(2)  |
| Ag(6)-N(2)#6  | 2.237(3)  |
| Ag(6)-O(9)#4  | 2.323(2)  |
| Ag(6)-O(7)    | 2.434(2)  |
| Ag(6)-O(8)    | 2.629(3)  |
| Ag(6)-O(10)#5 | 2.658(3)  |
| Ag(7)-N(4)    | 2.284(3)  |
| Ag(7)-O(9)#6  | 2.461(2)  |
| Ag(7)-O(10)   | 2.471(3)  |
| Ag(7)-O(2)#3  | 2.485(2)  |
| Ag(7)-O(7)    | 2.661(3)  |
| N(3)-O(10)    | 1.210(5)  |
| N(3)-O(11)    | 1.214(4)  |
| N(3)-O(12A)   | 1.303(6)  |
| N(3)-O(12B)   | 1.367(10) |
| O(1)-P(3)     | 1.514(3)  |
| O(2)-P(1)     | 1.522(2)  |
| O(3)-P(1)     | 1.526(2)  |
| O(4)-P(2)     | 1.522(2)  |
| O(5)-P(2)     | 1.516(3)  |
| O(6)-P(2)#5   | 1.530(2)  |
| O(7)-P(1)     | 1.522(2)  |
| O(8)-P(3)#6   | 1.522(3)  |
| O(9)-P(3)     | 1.538(2)  |

|                     |            |
|---------------------|------------|
| O(5)#1-Ag(1)-O(4)#2 | 131.45(9)  |
| O(5)#1-Ag(1)-O(1)   | 106.59(9)  |
| O(4)#2-Ag(1)-O(1)   | 107.25(9)  |
| O(5)#1-Ag(1)-O(4)   | 124.13(9)  |
| O(4)#2-Ag(1)-O(4)   | 80.56(9)   |
| O(1)-Ag(1)-O(4)     | 102.22(9)  |
| O(5)#2-Ag(2)-O(3)   | 153.12(8)  |
| O(5)#2-Ag(2)-O(1)   | 102.65(9)  |
| O(3)-Ag(2)-O(1)     | 78.46(9)   |
| O(5)#2-Ag(2)-O(8)#4 | 100.06(8)  |
| O(3)-Ag(2)-O(8)#4   | 104.38(8)  |
| O(1)-Ag(2)-O(8)#4   | 111.97(9)  |
| O(2)-Ag(3)-O(3)#5   | 120.80(8)  |
| O(2)-Ag(3)-O(6)     | 93.48(8)   |
| O(3)#5-Ag(3)-O(6)   | 127.78(8)  |
| N(1)-Ag(4)-O(6)     | 153.01(10) |
| N(1)-Ag(4)-O(3)     | 125.25(9)  |
| O(6)-Ag(4)-O(3)     | 81.46(8)   |
| N(1)-Ag(4)-O(4)     | 78.57(9)   |
| O(6)-Ag(4)-O(4)     | 108.41(8)  |
| O(3)-Ag(4)-O(4)     | 89.50(8)   |
| O(7)-Ag(5)-O(9)     | 123.81(8)  |
| O(7)-Ag(5)-O(8)     | 83.40(8)   |
| O(9)-Ag(5)-O(8)     | 150.03(8)  |
| O(7)-Ag(5)-O(2)#4   | 152.95(8)  |
| O(9)-Ag(5)-O(2)#4   | 78.57(8)   |
| O(8)-Ag(5)-O(2)#4   | 79.76(8)   |
| N(2)#6-Ag(6)-O(9)#4 | 151.17(10) |
| N(2)#6-Ag(6)-O(7)   | 117.23(10) |
| O(9)#4-Ag(6)-O(7)   | 91.40(8)   |
| N(4)-Ag(7)-O(9)#6   | 158.89(10) |
| N(4)-Ag(7)-O(10)    | 112.97(11) |
| O(9)#6-Ag(7)-O(10)  | 79.41(9)   |
| N(4)-Ag(7)-O(2)#3   | 115.06(10) |
| O(9)#6-Ag(7)-O(2)#3 | 76.41(8)   |
| O(10)-Ag(7)-O(2)#3  | 102.82(11) |
| O(10)-N(3)-O(11)    | 127.2(4)   |
| O(10)-N(3)-O(12A)   | 116.9(4)   |

|                    |          |
|--------------------|----------|
| O(11)-N(3)-O(12A)  | 111.6(4) |
| O(10)-N(3)-O(12B)  | 97.9(5)  |
| O(11)-N(3)-O(12B)  | 113.4(5) |
| O(12A)-N(3)-O(12B) | 75.8(5)  |

---

Symmetry transformations used to generate equivalent atoms:

#1 -x+2,-y,-z+2 #2 -x+1,-y,-z+2 #3 x+1,y,z  
#4 -x,-y,-z+1 #5 x-1,y,z #6 -x+1,-y,-z+1

**Table S2** Selected bond lengths [ $\text{\AA}$ ] and angles [ $^\circ$ ] for complex **2**.

---

|                   |            |
|-------------------|------------|
| Ag(1)-N(1)        | 2.1219(15) |
| P(1)-O(1)         | 1.4993(13) |
| P(1)-O(3)         | 1.5181(14) |
| P(1)-O(2)         | 1.5670(14) |
| O(2)-H(2)         | 0.760(19)  |
| O(3)-H(3O)        | 1.2100     |
|                   |            |
| N(1)-Ag(1)-N(1)#1 | 180.0      |
| O(1)-P(1)-O(3)    | 116.09(8)  |
| O(1)-P(1)-O(2)    | 113.27(7)  |
| O(3)-P(1)-O(2)    | 105.95(8)  |
| C(5)-N(1)-Ag(1)   | 125.31(12) |
| C(1)-N(1)-Ag(1)   | 116.41(12) |

---

Symmetry transformations used to generate equivalent atoms:

#1 -x+2,-y,-z

**Table S3** Crystal data and structure refinement for complexes **1** and **2**.

|                                                                                      | <b>1</b>                                                                                      | <b>2</b>                                                                       |
|--------------------------------------------------------------------------------------|-----------------------------------------------------------------------------------------------|--------------------------------------------------------------------------------|
| Empirical formula                                                                    | C <sub>15</sub> H <sub>12</sub> Ag <sub>7</sub> N <sub>4</sub> O <sub>12</sub> P <sub>3</sub> | C <sub>10</sub> H <sub>11</sub> AgN <sub>2</sub> O <sub>6</sub> P <sub>2</sub> |
| Formula weight                                                                       | 1288.29                                                                                       | 425.02                                                                         |
| T, K                                                                                 | 150(2)                                                                                        | 150(2)                                                                         |
| Crystal system                                                                       | Monoclinic                                                                                    | Monoclinic                                                                     |
| Space group                                                                          | <i>P2<sub>1</sub>/n</i>                                                                       | <i>P2<sub>1</sub>/n</i>                                                        |
| <i>a</i> , Å                                                                         | 5.8965(2)                                                                                     | 8.3129(8)                                                                      |
| <i>b</i> , Å                                                                         | 31.1708(12)                                                                                   | 6.2896(6)                                                                      |
| <i>c</i> , Å                                                                         | 13.7850(5)                                                                                    | 12.7052(12)                                                                    |
| $\alpha$ , deg.                                                                      | 90                                                                                            | 90                                                                             |
| $\beta$ , deg.                                                                       | 101.007(1)                                                                                    | 93.007(4)                                                                      |
| $\gamma$ , deg.                                                                      | 90                                                                                            | 90                                                                             |
| V, Å <sup>3</sup>                                                                    | 2487.05(16)                                                                                   | 663.37(11)                                                                     |
| <i>Z</i>                                                                             | 4                                                                                             | 2                                                                              |
| D <sub>calc</sub> , g/cm <sup>3</sup>                                                | 3.441                                                                                         | 2.128                                                                          |
| $\mu$ , mm <sup>-1</sup>                                                             | 5.661                                                                                         | 1.790                                                                          |
| <i>F</i> (000)                                                                       | 2400                                                                                          | 420                                                                            |
| Crystal size, mm                                                                     | 0.645 x 0.299 x 0.104                                                                         | 0.386 x 0.250 x 0.112                                                          |
| $\theta$ range for data collection, °                                                | 2.471 to 28.313                                                                               | 2.861 to 27.489                                                                |
| Reflections collected/independent                                                    | 113416 / 6183                                                                                 | 7704 / 1521                                                                    |
| <i>R</i> <sub>int</sub>                                                              | 0.0886                                                                                        | 0.0248                                                                         |
| Data / restraints / parameters                                                       | 6183 / 12 / 375                                                                               | 1521 / 1 / 100                                                                 |
| <i>S</i>                                                                             | 1.074                                                                                         | 1.063                                                                          |
| <i>R</i> <sub>1</sub> ; <i>wR</i> <sub>2</sub> [ <i>I</i> > 2 $\sigma$ ( <i>I</i> )] | 0.0258; 0.0414                                                                                | 0.0197; 0.0494                                                                 |
| <i>R</i> <sub>1</sub> ; <i>wR</i> <sub>2</sub> (all data)                            | 0.0388; 0.0441                                                                                | 0.0220; 0.0511                                                                 |
| Largest diff. peak/ hole, e.Å <sup>-3</sup>                                          | 0.958 / -0.887                                                                                | 0.477 / -0.450                                                                 |
